# Supplementary material for: Sirt1 carboxyl-domain is an ATP-repressible domain that is transferrable to other proteins
Source: PubMed Central journal article supplement (PMC5440690; doi:10.1038/ncomms15560), 2017-05-15
Supplement: ncomms15560-s1.pdf [file ncomms15560-s1.pdf]

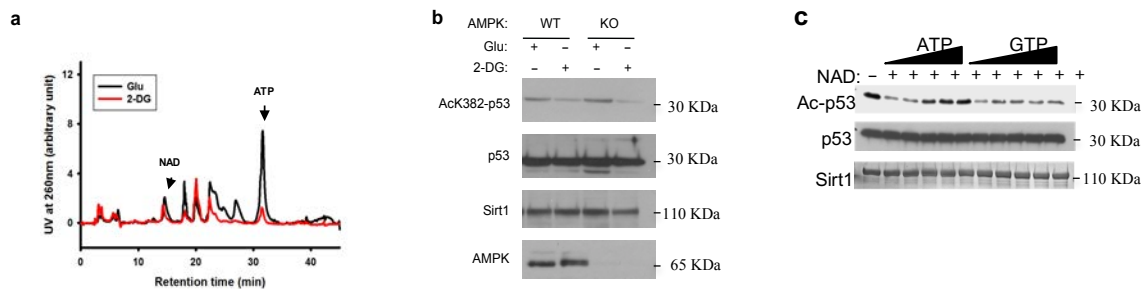

**Supplementary Fig. 1. Sirt1 and energy depletion** (a) Ion-pairing HPLC chromatogram of  $\text{NAD}^+$  and ATP. 293 HEK cells were treated with either 25 mM Glu or 25 mM 2-DG for 2 hours. Cells were extracted and separated for quantitation as described in Experimental procedures. (b) Murine embryo fibroblasts derived from wild-type (WT) or AMPK  $\alpha 1\alpha 2$  double knockout (KO) mice were incubated in media containing either glucose (25 mM) or 2-DG (25 mM) for 5 hours after ionizing radiation (20Gy). Acetylation of p53 was visualized by immunoblotting with antibody specific for Ac-k382. (c) Deacetylation reactions were performed with recombinant Sirt1 using Ac-p53 as substrate in the presence of 0-5 mM of ATP or GTP.

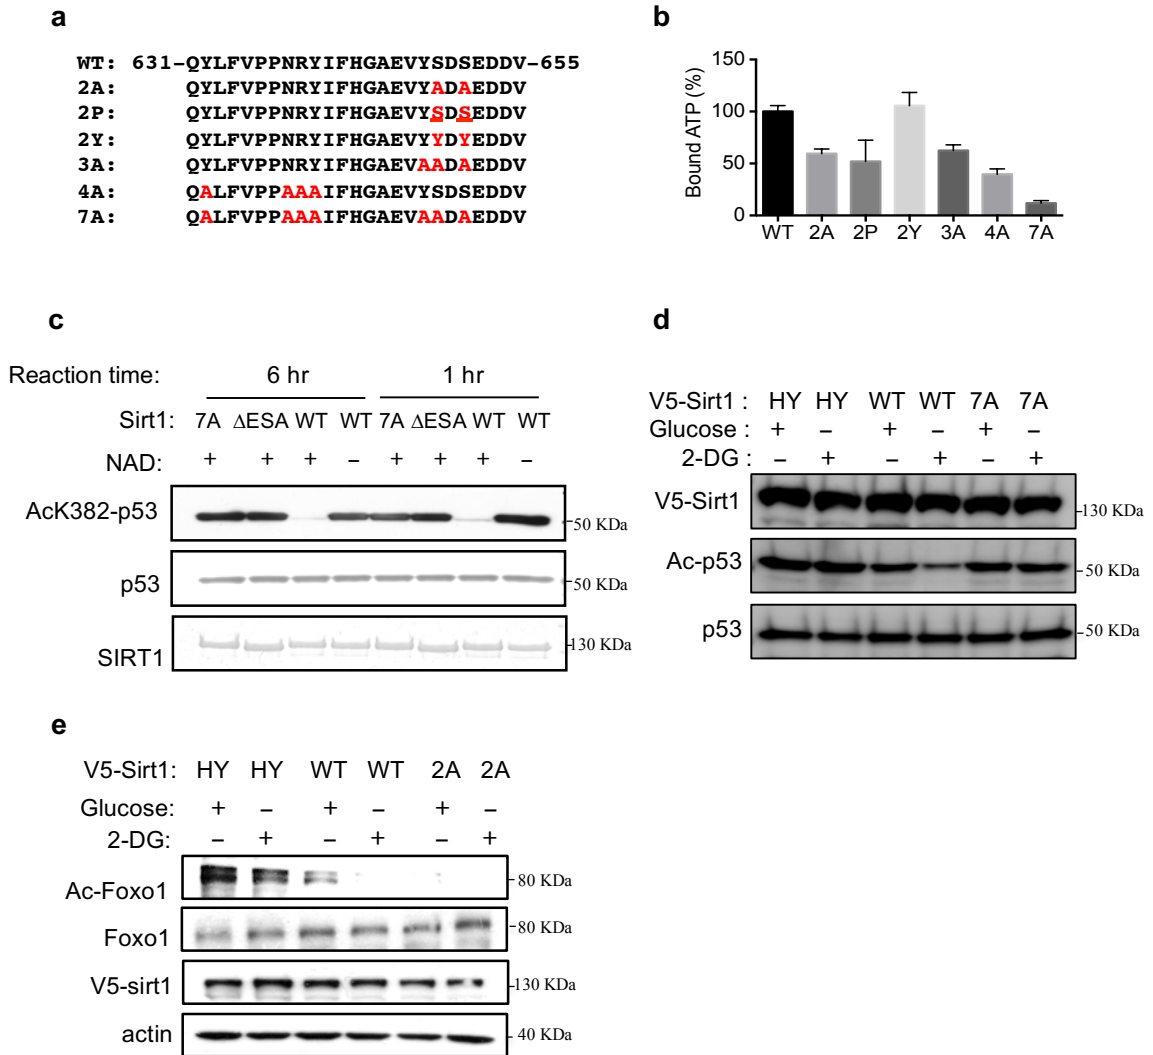

**Supplementary Fig. 2. ATP binding to ESA peptide (a)** The sequences of the ESA peptides used for ATP binding in panel B. The amino acid residues mutated to Ala(A), Tyr(Y) or phospho-Ser(S) in WT, A649/651 mutant (2A, 2Y, or 2P, respectively), A648/649/651 mutant (3A), A632/638/639/640 mutant (4A) and A632/638/639/640/648/649/651 mutant (7A) ESA peptides are indicated with red letters. **(b)** The relative levels of 8-azido-[ $\alpha$ - $^{32}$ P] ATP bound to these mutant ESA peptides compared with WT are shown (n=4). **(c)** Deacetylase reactions were performed with wild-type Sirt1 (WT) or Sirt1 without the ESA region ( $\Delta$ ESA) or with the 7A mutation using Ac-p53 as a substrate. Total levels of p53 and Sirt1 are shown below. **(d)** HEK293 cells were co-transfected with p53 expression vector and either HY, WT or 7A Sirt1 as indicated. The acetylation status of K382 in p53 was evaluated by immunoblotting with

an antibody specific for acetylated K382. (e) Sirt1 KO mefs stably expressing V5-tagged HY, WT or 2A Sirt1 were incubated with media containing either 25 mM Glu or 25 mM 2-DG for 2 hours and acetylation of Foxo1 was detected by immunoblotting whole cell extracts with acetyl Foxo1 antibody. A representative image from two independent experiments is shown.

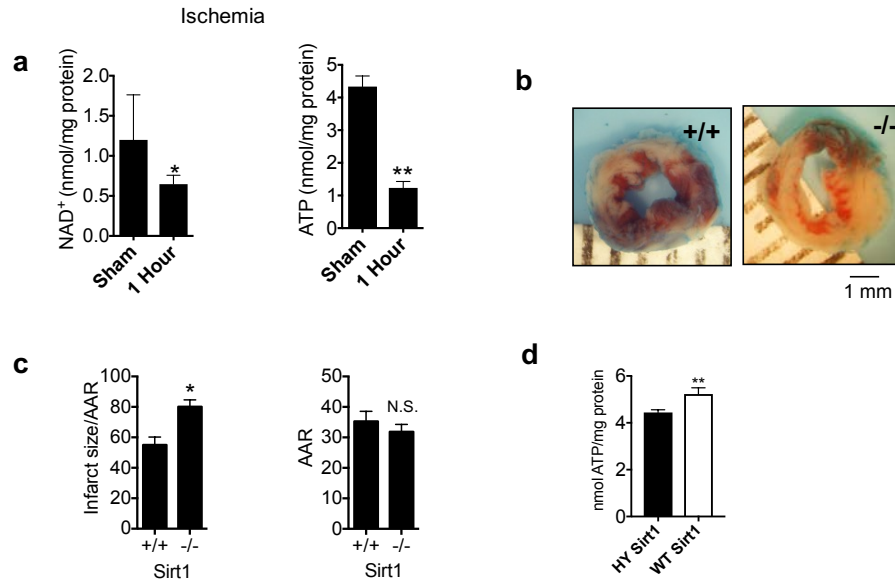

**Supplementary Fig. 3. Sirt1 protects against ATP depletion-induced myocardial infarction** (a) The levels of NAD<sup>+</sup> (left) and ATP (right) in sham and ischemic (1 hour) WT mice hearts were determined by HPLC. (b) Representative images for TTC staining of Sirt1<sup>-/-</sup> mice after 24 hours of ischemia. (c) The infarction area/area at risk (AAR) fraction was significantly greater in Sirt1<sup>-/-</sup> mice than in WT mice, while AAR was not significantly changed (N=5 for each group). (d) The levels of ATP in Sirt1 KO mefs stably expressing V5-tagged HY and WT Sirt1. Cells were incubated with DMEM media containing 10% fetal bovine serum (FBS) and harvested before reaching confluent state. Cells were extracted and separated for quantitation as described in Methods. Data are presented as mean ± SEM. \*, p<0.05; \*\*, p<0.01; N.S., not significant

**Main Fig. 1a**

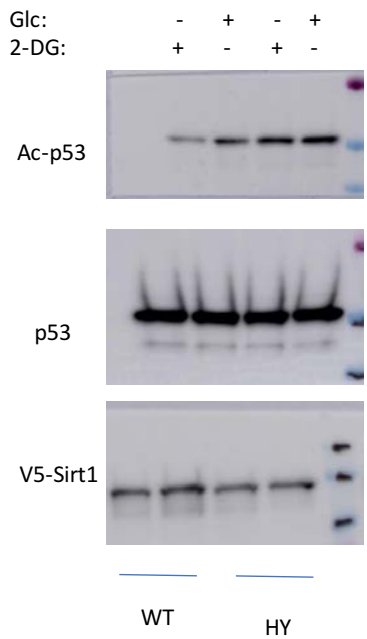

**Main Fig. 1b**

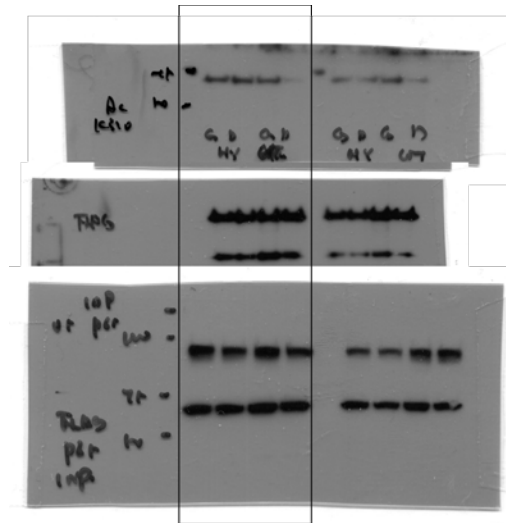

**Main Fig. 1f**

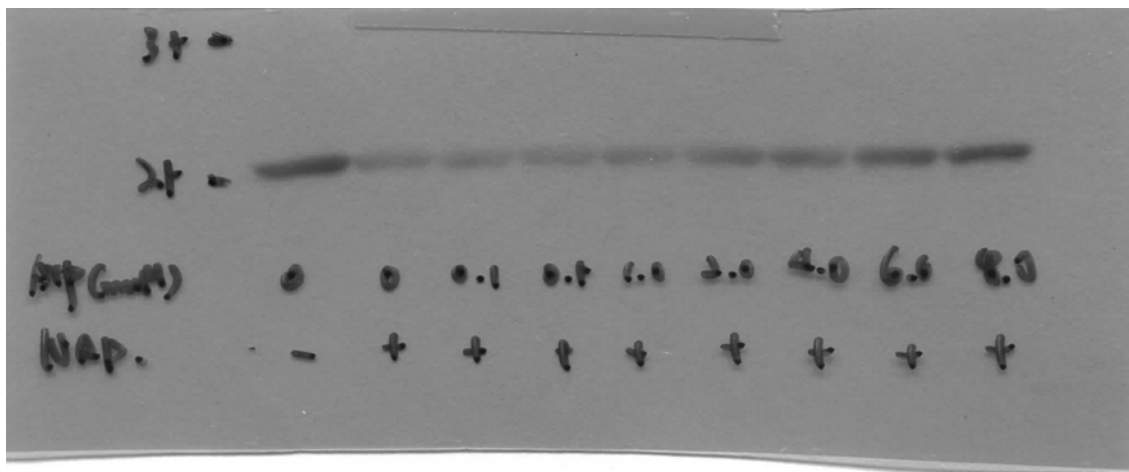

**Supplementary Fig. 4.** Uncropped scans of the most important Western blots presented in Fig. 1

**Main Fig. 2a**

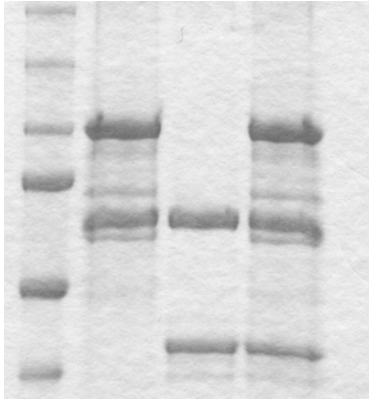

**Coomassie**

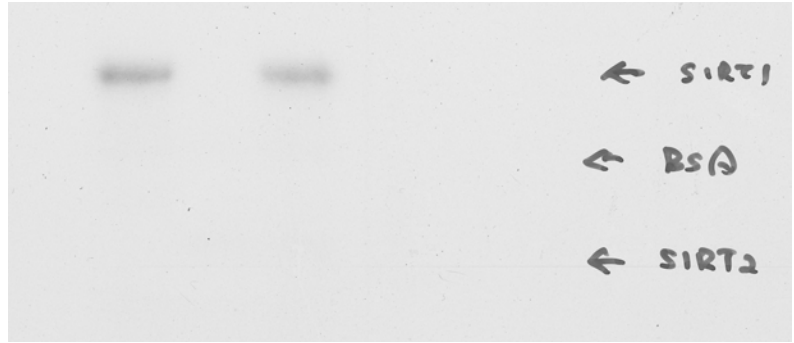

**Auto radiography**

**Main Fig. 2b**

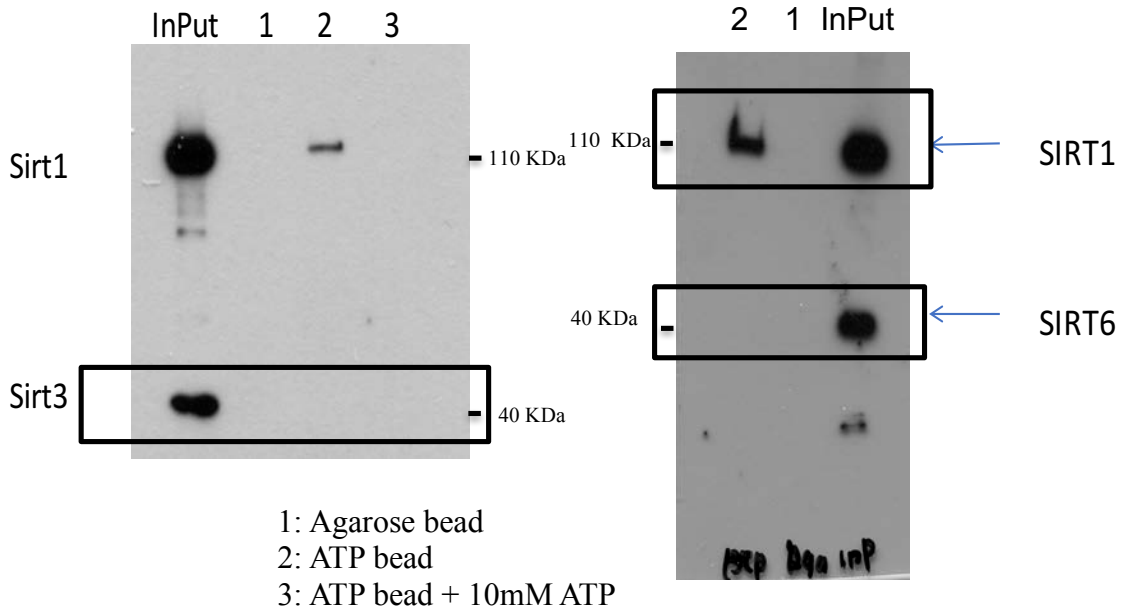

**Main Fig. 2c**

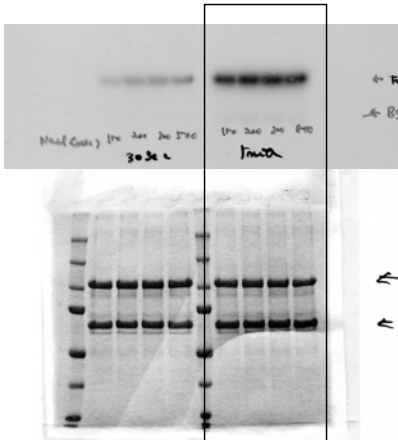

**Main Fig. 2d**

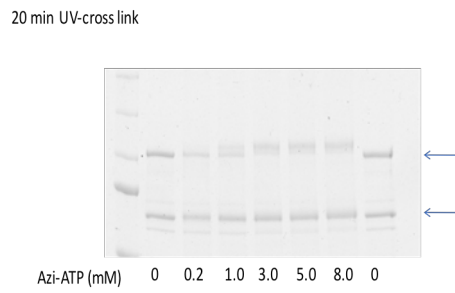

**Main Fig. 2i**

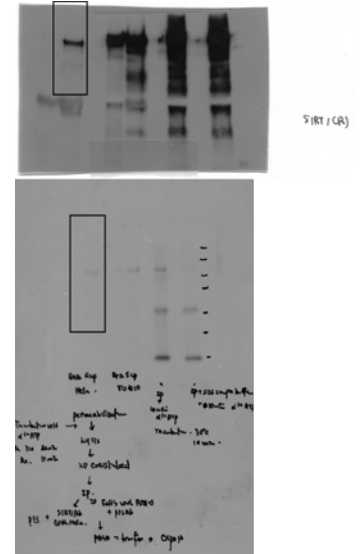

**Supplementary Fig. 5.** Uncropped scans of the most important Western blots presented in Fig. 2.

**Main Fig. 3a**

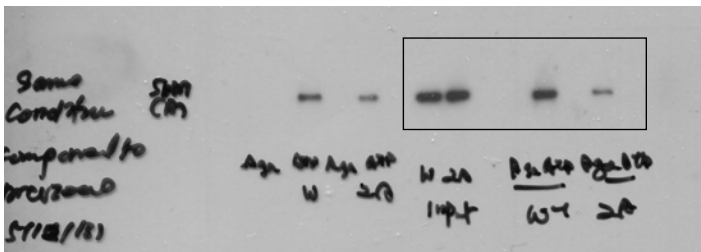

**Main Fig. 4a.**

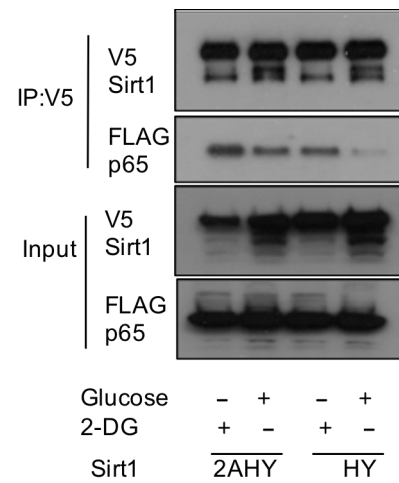

**Supplementary Fig. 6.** Uncropped scans of the most important Western blots presented in Fig. 3a and 4a.

**Main Fig. 6a**

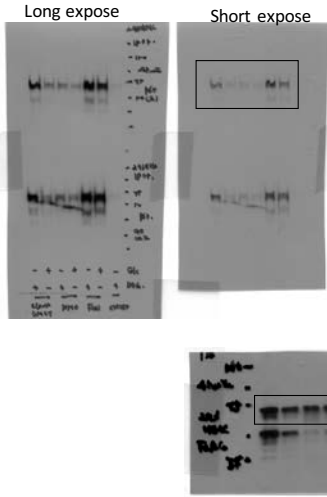

**Main Fig. 6c**

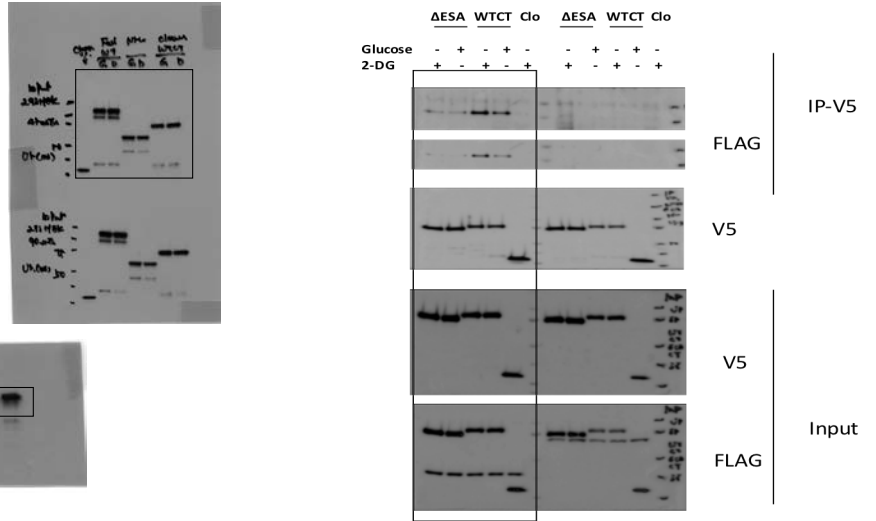

**Main Fig. 6d**

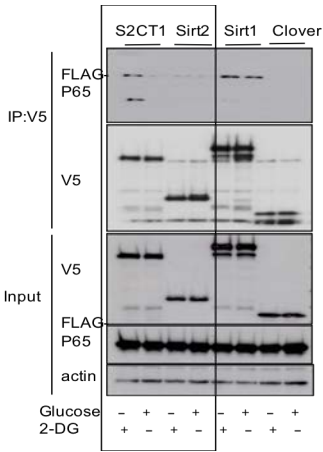

**Main Fig. 6e**

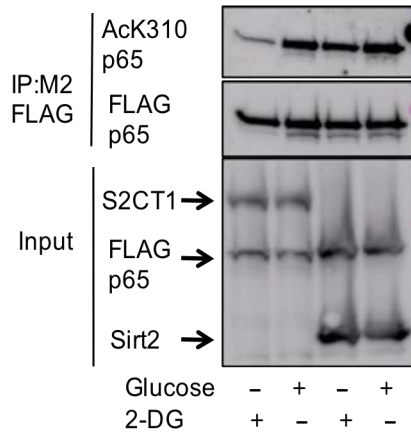

**Main Fig. 6f**

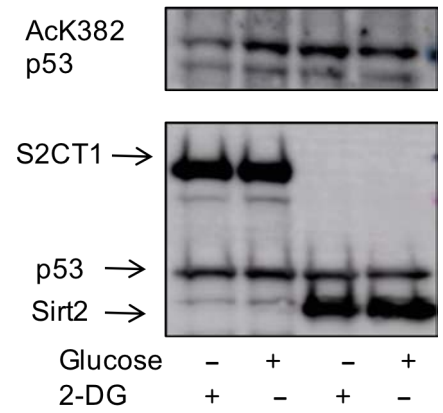

**Supplementary Fig. 7.** Uncropped scans of the most important Western blots presented in Fig. 6.



**Supplementary Fig. 2c.**

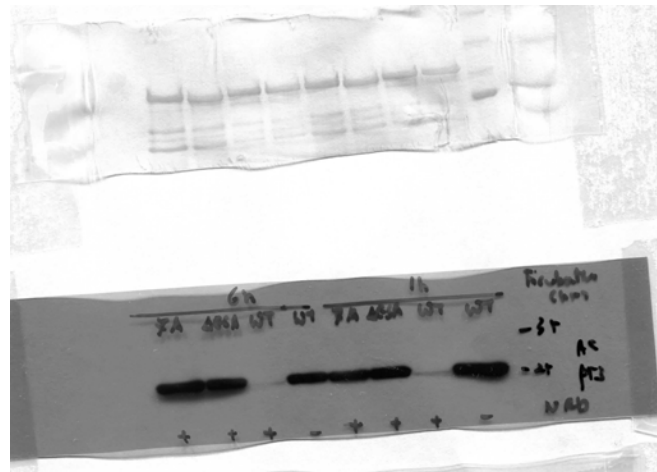

**Supplementary Fig. 2d.**

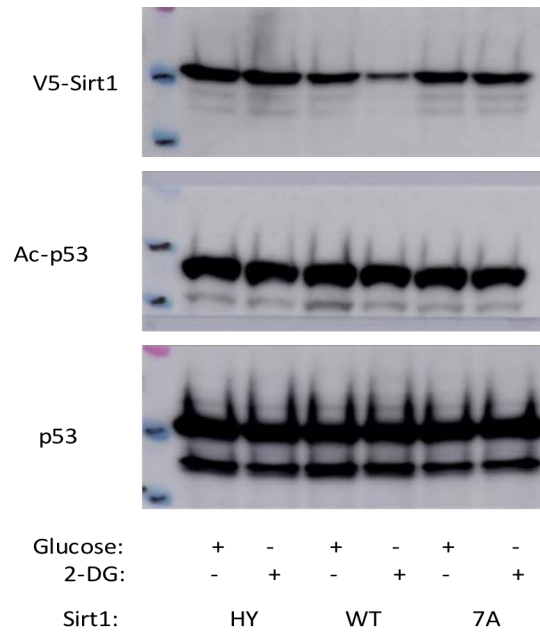

**Supplementary Fig. 8.** Uncropped scans of the most important Western blots presented in Supplementary Fig.2c and 2d.

**Supplementary Table 1.** ATP binding Sirt1 peptide sequence

| Peptide Sequence          | Amino Acid # | Ion Score | Charge | m/z+ (Da) | MH+ (Da) | Mass Accuracy (ppm) |
|---------------------------|--------------|-----------|--------|-----------|----------|---------------------|
| HGAEVYSDSEDDVL            | 643-656      | 36        | 2      | 768.332   | 1535.656 | 4.39                |
| SDSEDDVLSSSSc*            | 649-661      | 46        | 2      | 694.265   | 1387.522 | 3.9                 |
| QSPSLEEPLSESEIEEFY        | 671-689      | 78        | 2      | 1135.501  | 2269.994 | 3.1                 |
| YNGLEDDTERPEc*AGGSGF      | 689-707      | 38        | 2      | 1037.433  | 2073.859 | 6.46                |
| NGLEDDTERPEc*AGGSGF       | 690-707      | 92        | 2      | 955.901   | 1910.794 | 6.36                |
| c*AGGSGFGADGGDQEVVNEAIATR | 701-724      | 51        | 3      | 780.019   | 2338.044 | 3.04                |
| GADGGDQEVVNEAIATR         | 708-724      | 79        | 2      | 851.410   | 1701.812 | 4.78                |

High confidence peptide sequences were identified using the LTQ-Orbitrap MS/MS.

\*Cystein residues that were found to be carbamidomethylated.

**Supplementary Table 2. Summary of Kinetic Parameters**

| Enzyme   | substrate        | $K_m$ ( $\mu M$ )  | $k_{cat}$ ( $min^{-1}$ ) |
|----------|------------------|--------------------|--------------------------|
| WT Sirt1 | Ac-H4            | $26.83 \pm 2.32$   | $0.43 \pm 0.08$          |
| WT Sirt1 | NAD <sup>+</sup> | $203.08 \pm 13.24$ | $0.40 \pm 0.04$          |
| 2A Sirt1 | Ac-H4            | $23.11 \pm 0.80$   | $0.41 \pm 0.12$          |
| 2A Sirt1 | NAD <sup>+</sup> | $186.01 \pm 7.07$  | $0.54 \pm 0.08$          |

**Supplementary Table 3.** Inhibition constants for WT and 2A Sirt1

| Enzyme   | inhibitor | substrate        | $K_{ij}$ (mM) | $K_{is}$ (mM) |
|----------|-----------|------------------|---------------|---------------|
| WT Sirt1 | ATP       | Ac-H4            | 4.16 ± 0.16   | 4.67 ± 3.01   |
| WT Sirt1 | ATP       | NAD <sup>+</sup> | 3.00 ± 0.33   | 9.60 ± 2.61   |
| 2A Sirt1 | ATP       | Ac-H             | 6.45 ± 0.51   | 5.91 ± 7.23   |
| 2A Sirt1 | ATP       | NAD <sup>+</sup> | 4.35 ± 0.53   | 8.61 ± 1.38   |

**Supplementary Table 4.** The sequences of primers of target genes for SYBR Green PCR

| Name                     | Primer sequence               |
|--------------------------|-------------------------------|
| aP2 (Fabp4)-Forward      | 5'-GATGCCTTTGTGGGAACCT-3'     |
| aP2 (Fabp4)-Reverse      | 5'-CTGTCGTCTGCGGTGATTT-3'     |
| Leptin-Forward           | 5'-CCTCATCAAGACCATTGTCACC-3'  |
| Leptin-Reverse           | 5'-CCTCATCAAGACCATTGTCACC-3'  |
| Adiponectin-Forward      | 5'-GCACTGGCAAGTTCTACTGCAA-3'  |
| Adiponectin-Reverse      | 5'-GTAGGTGAAGAGAACGGCCTTGT-3' |
| Ppara $\alpha$ -Forward  | 5'-GCGTACGGCAATGGCTTTAT-3'    |
| Ppara $\alpha$ -Reverse  | 5'-GAACGGCTTCCTCAGGTTCTT-3'   |
| Ppara $\gamma$ -Forward  | 5'-TCAGCTCTGTGGACCTCTCC-3'    |
| Ppara $\gamma$ -Reverse  | 5'-ACCCTTGCATCCTTCACAAG-3'    |
| $\beta$ -actin –Forward  | 5'-TTGCTGACAGGATGCAGAAG-3'    |
| $\beta$ -actin - Reverse | 5'-GAAAGGGTGTAAAACGCAGC-3'    |
